# Supplementary material for: Mutants with Enhanced Cellobiose-Fermenting Ability from Thermotolerant Kluyveromyces marxianus DMKU 3-1042, Which Are Beneficial for Fermentation with Cellulosic Biomass
Source: MDPI journal article supplement (doi:10.3390/fuels3020015), 2022-04-29
Supplement: s1 [file s1]

Archive with 1 entries (1 files):
- fuels-1587128-supplementary.pdf
