# Supplementary material for: Mutants with Enhanced Cellobiose-Fermenting Ability from Thermotolerant Kluyveromyces marxianus DMKU 3-1042, Which Are Beneficial for Fermentation with Cellulosic Biomass
Source: MDPI journal article supplement (doi:10.3390/fuels3020015), 2022-04-29
Supplement: s1 [file s1 › fuels-1587128-supplementary.pdf]

## Supplementary Materials

**Mutants with enhanced cellobiose-fermenting ability from thermotolerant *Kluyveromyces marxianus* DMKU 3-1042, which are beneficial for fermentation with cellulosic biomass**

Masayuki Murata<sup>1</sup>, Sornsiri Pattanakittivorakul<sup>2</sup>, Toshiro Manabe<sup>3</sup>, Savitree Limtong<sup>4</sup> and Mamoru Yamada<sup>1,2,5\*</sup>

<sup>1</sup> *Research Center for Thermotolerant Microbial Resources, Yamaguchi University, Yamaguchi 753-8315, Japan*

<sup>2</sup> *Graduate School of Science and Technology for Innovation, Yamaguchi University, Yamaguchi 753-8515, Japan*

<sup>3</sup> *J.COMM Co., Ltd, Himi hei 477, Saijo, Ehime 793-0073, Japan*

<sup>4</sup> *Department of Microbiology, Faculty of Science, Kasetsart University, Chatuchak, Bangkok 10900, Thailand*

<sup>5</sup> *Department of Biological Chemistry, Faculty of Agriculture, Yamaguchi University, Yamaguchi 753-8515, Japan*

\* Correspondence to Mamoru Yamada: [m-yamada@yamaguchi-u.ac.jp](mailto:m-yamada@yamaguchi-u.ac.jp) ORCID:0000-0003-4354-7324

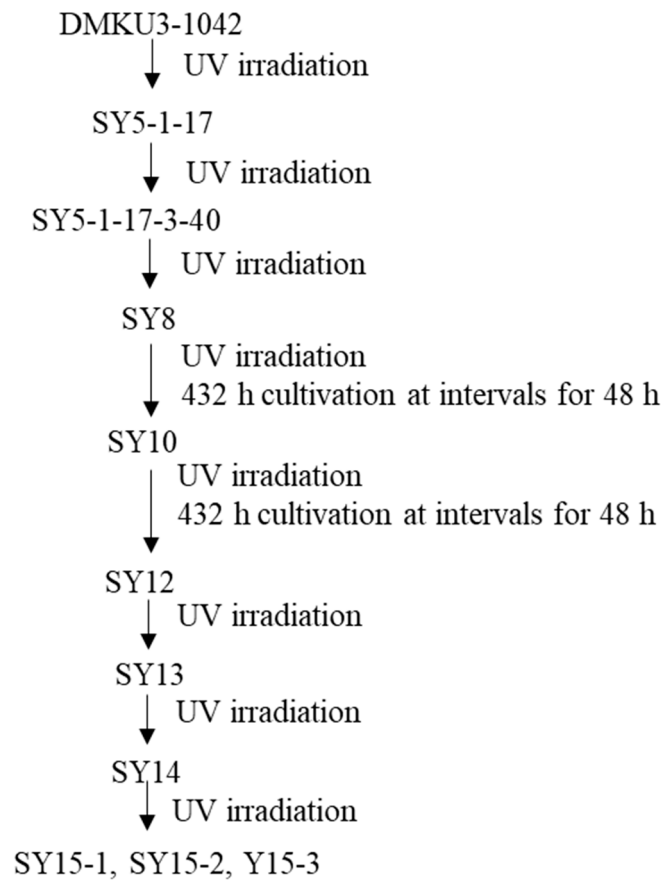

Figure S1. Schematic procedure for development of cellobiose-fermenting mutants from *K. marxianus* DMKU3-1042. The details are described in Materials and Methods.

Table S1. Mutations in protein-coding regions of isolated mutants.

| Mutants | Gene       | Product                                            | Amino acid change | Function                         |
|---------|------------|----------------------------------------------------|-------------------|----------------------------------|
| SY10    | KLMA_10393 | LrgB superfamily                                   | H → P             | Uncharacterized protein          |
|         | KLMA_10684 | Uncharacterized protein                            | T → P             | Transporter                      |
|         | YRM1       | Zinc finger transcription factor YRR1              | I → K             | Transcription factor             |
|         | CDC55      | Protein phosphatase PP2A regulatory subunit B      | S → F             | Cell cycle                       |
|         | SLU7       | pre-mRNA-splicing factor SLU7                      | Q insertion       | Transcription factor             |
|         | RGT1       | Glucose transport transcription regulator RGT1     | Y → stop codon    |                                  |
|         | UGA4       | GABA-specific permease                             | F → L             | Transporter                      |
|         | CDC10      | Cell division control protein 10                   | I → T             | Cytoskeleton protein             |
|         | MDR1       | GTPase-activating protein GYP2                     | Deletion          | Membrane trafficking             |
|         | UBP12      | Ubiquitin carboxyl-terminal hydrolase 12           | E → G             | Peptidases and inhibitor         |
|         | GAL1       | Galactokinase                                      | S → P             | Galactose metabolism             |
|         | MID1       | Stretch-activated cation channel MID1              | P → S             | Transporter                      |
| SY13    | AMN1       | Antagonist of mitotic exit network protein 1       | K → Stop codon    | Cell cycle                       |
|         | SRP101     | Signal recognition particle receptor subunit alpha | K → R             | Signaling and cellular processes |
|         | FKS3       | 1,3-beta-glucan synthase component GSC2            | L → S             | Starch and sucrose metabolism    |
|         | CSF1       | Protein CSF1                                       | L → F             | Uncharacterized protein          |
|         | UPC2       | Sterol regulatory element-binding protein ECM22    | S → F             | Uncharacterized protein          |
|         | KLMA_50610 | Adenylosuccinate synthetase                        | K → E             | Purine metabolism, Alanine,      |

|      |            |                                                |                |                                    |
|------|------------|------------------------------------------------|----------------|------------------------------------|
|      |            |                                                |                | aspartate and glutamate metabolism |
|      | SPT7       | Transcriptional activator SPT7                 | L → M          | Transcription factor               |
|      | KLMA_10393 | LrgB superfamily                               | H → P          | Uncharacterized protein            |
|      | KLMA_10684 | Uncharacterized protein                        | T → P          | Transporter                        |
|      | YRM1       | Zinc finger transcription factor YRR1          | I → K          | Transcription factor               |
|      | CDC55      | Protein phosphatase PP2A regulatory subunit B  | S → F          | Cell cycle                         |
|      | SLU7       | Pre-mRNA-splicing factor SLU7                  | Q insertion    | Transcription factor               |
|      | RGT1       | Glucose transport transcription regulator RGT1 | Y → Stop codon | Transcription factor               |
|      | UGA4       | GABA-specific permease                         | F → L          | Transporter                        |
|      | CDC10      | Cell division control protein 10               | I → T          | Cytoskeleton protein               |
|      | MDR1       | GTPase-activating protein GYP2                 | Deletion       | Membrane trafficking               |
|      | UBP12      | Ubiquitin carboxyl-terminal hydrolase 12       | E → G          | Peptidase and inhibitor            |
|      | GAL1       | Galactokinase                                  | S → P          | Galactose metabolism               |
|      | MID1       | Stretch-activated cation channel MID1          | P → S          | Transporter                        |
| SY14 | HGT1       | High-affinity glucose transporter              | Y → Stop codon | Transporter                        |
|      | NGL1       | RNA exonuclease NGL1                           | F → S          | Transcription                      |
|      | LAC12      | Lactose permease                               | M → L          | Transporter                        |
|      | KHT2       | Hexose transporter 2                           | S → G          | Transporter                        |
|      | RAG1       | Low-affinity glucose transporter               | N → D          | Transporter                        |
|      | MEC1       | Serine/Threonine-protein kinase MEC1           | P → S          | Cellular Processes                 |
|      | KLMA_80374 | Uncharacterized protein                        | P → L          | Uncharacterized protein            |

|        |            |                                                    |                |                                                                |
|--------|------------|----------------------------------------------------|----------------|----------------------------------------------------------------|
|        | AMN1       | Antagonist of mitotic exit network protein 1       | K → Stop codon | Cell cycle                                                     |
|        | SRP101     | Signal recognition particle receptor subunit alpha | K → R          | Signaling and cellular processes                               |
|        | FKS3       | 1,3-beta-glucan synthase component GSC2            | L → S          | Starch and sucrose metabolism                                  |
|        | CSF1       | Protein CSF1                                       | L → F          | Uncharacterized protein                                        |
|        | UPC2       | Sterol regulatory element-binding protein ECM22    | S → F          | Uncharacterized protein                                        |
|        | KLMA_50610 | Adenylosuccinate synthetase                        | K → E          | Purine metabolism, Alanine, aspartate and glutamate metabolism |
|        | SPT7       | Transcriptional activator SPT7                     | L → M          | Transcription factor                                           |
|        | KLMA_10393 | LrgB superfamily                                   | H → P          | Uncharacterized protein                                        |
|        | KLMA_10684 | Uncharacterized protein                            | T → P          | Transporter                                                    |
|        | YRM1       | Zinc finger transcription factor YRR1              | I → K          | Transcription factor                                           |
|        | CDC55      | Protein phosphatase PP2A regulatory subunit B      | S → F          | Cell cycle                                                     |
|        | SLU7       | Pre-mRNA-splicing factor SLU7                      | Q insertion    | Transcription factor                                           |
|        | RGT1       | Glucose transport transcription regulator RGT1     | Y → stop codon | Transcription factor                                           |
|        | UGA4       | GABA-specific permease                             | F → L          | Transporter                                                    |
|        | CDC10      | Cell division control protein 10                   | I → T          | Cytoskeleton protein                                           |
|        | MDR1       | GTPase-activating protein GYP2                     | Deletion       | Membrane trafficking                                           |
|        | UBP12      | Ubiquitin carboxyl-terminal hydrolase 12           | E → G          | Peptidase and inhibitor                                        |
|        | GAL1       | Galactokinase                                      | S → P          | Galactose metabolism                                           |
|        | MID1       | Stretch-activated cation channel MID1              | P → S          | Transporter                                                    |
| SY15-1 | PRP16      | Pre-mRNA-splicing factor ATP-dependent             | M → I          | Peptidase and inhibitor                                        |

|            |                                                    |                |                                                                |
|------------|----------------------------------------------------|----------------|----------------------------------------------------------------|
|            | RNA helicase PRP16                                 |                |                                                                |
| RSN1       | Uncharacterized protein RSN1                       | W → Stop codon | Uncharacterized protein                                        |
| KLMA_30481 | Glyoxalase super family protein                    | S → L          | Uncharacterized protein                                        |
| HKR1       | Glycoprotein                                       | T → P          | Cell wall                                                      |
| HGT1       | High-affinity glucose transporter                  | Y → Stop codon | Transporter                                                    |
| NGL1       | RNA exonuclease NGL1                               | F → S          | Transcription                                                  |
| LAC12      | Lactose permease                                   | M → L          | Transporter                                                    |
| KHT2       | Hexose transporter 2                               | S → G          | Transporter                                                    |
| RAG1       | Low-affinity glucose transporter                   | N → D          | Transporter                                                    |
| MEC1       | Serine/Threonine-protein kinase MEC1               | P → S          | Cellular Processes                                             |
| KLMA_80374 | Uncharacterized protein                            | P → L          | Uncharacterized protein                                        |
| AMN1       | Antagonist of mitotic exit network protein 1       | K → Stop codon | Cell cycle                                                     |
| SRP101     | Signal recognition particle receptor subunit alpha | K → R          | Signaling and cellular processes                               |
| FKS3       | 1,3-beta-glucan synthase component GSC2            | L → S          | Starch and sucrose metabolism                                  |
| CSF1       | Protein CSF1                                       | L → F          | Uncharacterized protein                                        |
| UPC2       | Sterol regulatory element-binding protein ECM22    | S → F          | Uncharacterized protein                                        |
| KLMA_50610 | Adenylosuccinate synthetase                        | K → E          | Purine metabolism, Alanine, aspartate and glutamate metabolism |
| SPT7       | Transcriptional activator SPT7                     | L → M          | Transcription factor                                           |
| KLMA_10393 | LrgB superfamily                                   | H → P          | Uncharacterized protein                                        |
| KLMA_10684 | Uncharacterized protein                            | T → P          | Transporter                                                    |
| YRM1       | Zinc finger transcription factor YRR1              | I → K          | Transcription factor                                           |

|        |            |                                                    |                |                                  |
|--------|------------|----------------------------------------------------|----------------|----------------------------------|
|        | CDC55      | Protein phosphatase PP2A regulatory subunit B      | S → F          | Cell cycle                       |
|        | SLU7       | Pre-mRNA-splicing factor SLU7                      | Q insertion    | Transcription factor             |
|        | RGT1       | Glucose transport transcription regulator RGT1     | Y → Stop codon | Transcription factor             |
|        | UGA4       | GABA-specific permease                             | F → L          | Transporter                      |
|        | CDC10      | Cell division control protein 10                   | I → T          | Cytoskeleton protein             |
|        | MDR1       | GTPase-activating protein GYP2                     | Deletion       | Membrane trafficking             |
|        | UBP12      | Ubiquitin carboxyl-terminal hydrolase 12           | E → G          | Peptidase and inhibitor          |
|        | GAL1       | Galactokinase                                      | S → P          | Galactose metabolism             |
|        | MID1       | Stretch-activated cation channel MID1              | P → S          | Transporter                      |
| SY15-2 | RCY1       | Recyclin-1                                         | N → I          | Ubiquitin system                 |
|        | CCT4       | T-complex protein 1 subunit delta                  | G → N          | Signaling and cellular processes |
|        | HGT1       | High-affinity glucose transporter                  | Y → Stop codon | Transporter                      |
|        | NGL1       | RNA exonuclease NGL1                               | F → S          | Transcription                    |
|        | LAC12      | Lactose permease                                   | M → L          | Transporter                      |
|        | KHT2       | Hexose transporter 2                               | S → G          | Transporter                      |
|        | RAG1       | Low-affinity glucose transporter                   | N → D          | Transporter                      |
|        | MEC1       | Serine/Threonine-protein kinase MEC1               | P → S          | Cellular Processes               |
|        | KLMA_80374 | Uncharacterized protein                            | P → L          | Uncharacterized protein          |
|        | AMN1       | Antagonist of mitotic exit network protein 1       | K → Stop codon | Cell cycle                       |
|        | SRP101     | Signal recognition particle receptor subunit alpha | K → R          | Signaling and cellular processes |
|        | FKS3       | 1,3-beta-glucan synthase component GSC2            | L → S          | Starch and sucrose metabolism    |
|        | CSF1       | Protein CSF1                                       | L → F          | Uncharacterized protein          |

|        |            |                                                 |                |                                                                |
|--------|------------|-------------------------------------------------|----------------|----------------------------------------------------------------|
|        | UPC2       | Sterol regulatory element-binding protein ECM22 | S → F          | Uncharacterized protein                                        |
|        | KLMA_50610 | Adenylosuccinate synthetase                     | K → E          | Purine metabolism, Alanine, aspartate and glutamate metabolism |
| SY15-3 | SPT7       | Transcriptional activator SPT7                  | L → M          | Transcription factor                                           |
|        | KLMA_10393 | LrgB superfamily                                | H → P          | Uncharacterized protein                                        |
|        | KLMA_10684 | Uncharacterized protein                         | T → P          | Transporter                                                    |
|        | YRM1       | Zinc finger transcription factor YRR1           | I → K          | Transcription factor                                           |
|        | CDC55      | Protein phosphatase PP2A regulatory subunit B   | S → F          | Cell cycle                                                     |
|        | SLU7       | Pre-mRNA-splicing factor SLU7                   | Q insertion    | Transcription factor                                           |
|        | RGT1       | Glucose transport transcription regulator RGT1  | Y → Stop codon | Transcription factor                                           |
|        | UGA4       | GABA-specific permease                          | F → L          | Transporter                                                    |
|        | CDC10      | Cell division control protein 10                | I → T          | Cytoskeleton protein                                           |
|        | MDR1       | GTPase-activating protein GYP2                  | Deletion       | Membrane trafficking                                           |
|        | UBP12      | Ubiquitin carboxyl-terminal hydrolase 12        | E → G          | Peptidases and inhibitor                                       |
|        | GAL1       | Galactokinase                                   | S → P          | Galactose metabolism                                           |
|        | MID1       | Stretch-activated cation channel MID1           | P → S          | Transporter                                                    |
|        | ILV2       | Acetolactate synthase                           | R → P          | Valine, leucine and isoleucine biosynthesis                    |
|        | GAR1       | H/ACA ribonucleoprotein complex subunit 1       | S → C          | Translation                                                    |
|        | HGT1       | High-affinity glucose transporter               | Y → Stop codon | Transporter                                                    |
|        | NGL1       | RNA exonuclease NGL1                            | F → S          | Transcription                                                  |

|            |                                                    |                |                                                                |
|------------|----------------------------------------------------|----------------|----------------------------------------------------------------|
| LAC12      | Lactose permease                                   | M → L          | Transporter                                                    |
| KHT2       | Hexose transporter 2                               | S → G          | Transporter                                                    |
| MEC1       | Serine/Threonine-protein kinase MEC1               | P → S          | Cellular Processes                                             |
| KLMA_80374 | Uncharacterized protein                            | P → L          | Uncharacterized protein                                        |
| AMN1       | Antagonist of mitotic exit network protein 1       | K → Stop codon | Cell cycle                                                     |
| SRP101     | Signal recognition particle receptor subunit alpha | K → R          | Signaling and cellular processes                               |
| FKS3       | 1,3-beta-glucan synthase component GSC2            | L → S          | Starch and sucrose metabolism                                  |
| CSF1       | Protein CSF1                                       | L → F          | Uncharacterized protein                                        |
| UPC2       | Sterol regulatory element-binding protein ECM22    | S → F          | Uncharacterized protein                                        |
| KLMA_50610 | Adenylosuccinate synthetase                        | K → E          | Purine metabolism, Alanine, aspartate and glutamate metabolism |
| SPT7       | Transcriptional activator SPT7                     | L → M          | Transcription factor                                           |
| KLMA_10393 | LrgB superfamily                                   | H → P          | Uncharacterized protein                                        |
| KLMA_10684 | Uncharacterized protein                            | T → P          | Transporter                                                    |
| YRM1       | Zinc finger transcription factor YRR1              | I → K          | Transcription factor                                           |
| CDC55      | Protein phosphatase PP2A regulatory subunit B      | S → F          | Cell cycle                                                     |
| SLU7       | Pre-mRNA-splicing factor SLU7                      | Q insertion    | Transcription factor                                           |
| RGT1       | Glucose transport transcription regulator RGT1     | Y → Stop codon | Transcription factor                                           |
| UGA4       | GABA-specific permease                             | F → L          | Transporter                                                    |
| CDC10      | Cell division control protein 10                   | I → T          | Cytoskeleton protein                                           |
| MDR1       | GTPase-activating protein GYP2                     | Deletion       | Membrane trafficking                                           |
| UBP12      | Ubiquitin carboxyl-terminal hydrolase 12           | E → G          | Peptidases and inhibitor                                       |

GAL1

Galactokinase

$S \rightarrow P$

Galactose metabolism

MID1

Stretch-activated cation channel MID1

$P \rightarrow S$

Transporter
